# Supplementary material for: Chemical and protein shifts in the spectrum of the photoactive yellow protein: a time-dependent density functional theory/molecular mechanics study
Source: Royal Society of Chemistry journal article supplement (doi:10.1039/b902615k), 2009-01-01
Supplement: b902615k-addcorrv2.doc [file b902615k-addcorrv2.doc]

**Additions and corrections**

**Chemical and protein shifts in the spectrum of the photoactive yellow protein: a time-dependent density functional theory/molecular mechanics study**

Eneritz Muguruza González, Leonardo Guidoni and Carla Molteni

*Phys. Chem. Chem. Phys.*, 2009, **11**, 4556 (DOI: 10.1039/ b902615k). ***Amendment published 22nd June 2009***

The second and fifth authors’ names in ref. 14 were misspelled. The reference should read:

14 I. B. Nielsen, S. Boyé-Péronne, M. O. A. El Ghazaly, M. B. Kristensen, S. Brøndsted Nielsen and L. H. Andersen, *Biophys. J.*, 2005, **89**, 2597.

The Royal Society of Chemistry apologises for these errors and any consequent inconvenience to authors and readers.
